# Supplementary material for: Comparative Proteomic Analysis of Two Ralstonia solanacearum Isolates Differing in Aggressiveness
Source: MDPI journal article supplement (doi:10.3390/ijms19082444), 2018-08-18
Supplement: s1 [file s1]

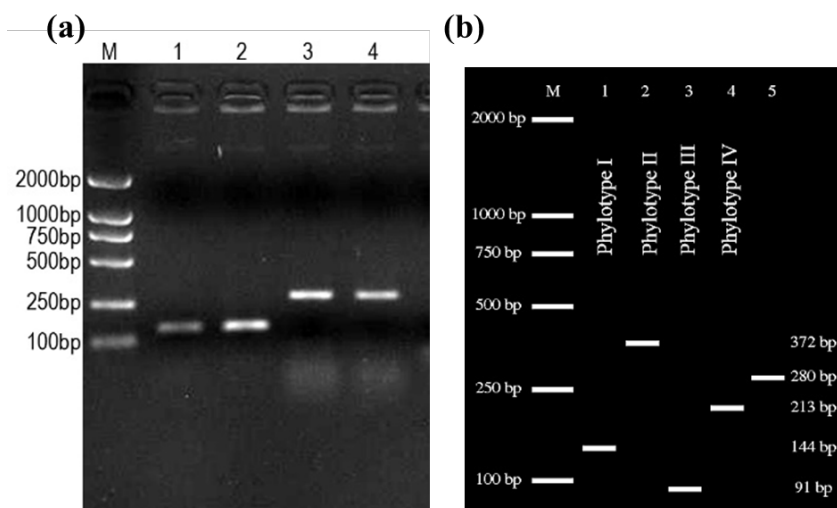

FigureS1 (a)Electrophoretic analysis of polymerase chain reaction(PCR)-amplified DNA from *R. solanacearum* strains RsM and RsH using primer pairs(Nmult21F/Nmult21RR and 759/760)(Fegan and Prior, 2005). LanesM. DNA Marker DL2000; line 1.a representative phylotype I in *R. solanacearum* strain RsM ; line2. a representative phylotype I in *R. solanacearum* strain RsH I; line3. *R. solanacearum*-specific band in RsM; line4. *R. solanacearum*-specific band in RsH, the arrow represent the Phylotype I specific band (166bp); (b) PCR products of different phylotypes.

| NW Score  | Identities                                                   | Gaps      | Str  |
|-----------|--------------------------------------------------------------|-----------|------|
| 1332      | 666/666(100%)                                                | 0/666(0%) | Plu: |
| Query 1   | ACCGACACCAAGCCCTGAAGACGGCCGCCACCACTCGATCTCGCCGTTGTGGCTCACC   | 60        |      |
| Sbjct 1   | ACCGACACCAAGCCCTGAAGACGGCCGCCACCACTCGATCTCGCCGTTGTGGCTCACC   | 60        |      |
| Query 61  | GTCGCCAAGGACAGCGCGGCGTTACGGTGAGCGGCACGCGACGGTGCGCTATGGCGCC   | 120       |      |
| Sbjct 61  | GTCGCCAAGGACAGCGCGGCGTTACGGTGAGCGGCACGCGACGGTGCGCTATGGCGCC   | 120       |      |
| Query 121 | GGCAGCGCGTGGGTGGCGAAGAGCATGTCCGGCACAGGCCAGTGACCGCGCCCTTCTTC  | 180       |      |
| Sbjct 121 | GGCAGCGCGTGGGTGGCGAAGAGCATGTCCGGCACAGGCCAGTGACCGCGCCCTTCTTC  | 180       |      |
| Query 181 | GGCAAGGATCCGGCGCGCGGTGTCGCCAAGGTGTGCCAAGTGCGCAGGGCACGGGCACC  | 240       |      |
| Sbjct 181 | GGCAAGGATCCGGCGCGCGGTGTCGCCAAGGTGTGCCAAGTGCGCAGGGCACGGGCACC  | 240       |      |
| Query 241 | CTGCTGTGGCGCGGCTCAGCCTGGCCGGCGCCGAGTTCGGGGAGGGCAGCCTGCCGGC   | 300       |      |
| Sbjct 241 | CTGCTGTGGCGCGGCTCAGCCTGGCCGGCGCCGAGTTCGGGGAGGGCAGCCTGCCGGC   | 300       |      |
| Query 301 | ACCTACGGGAGCAACTACATCTATCCGTCCGCCGACAGCGGACCTACTACAAGAACAAG  | 360       |      |
| Sbjct 301 | ACCTACGGGAGCAACTACATCTATCCGTCCGCCGACAGCGGACCTACTACAAGAACAAG  | 360       |      |
| Query 361 | GGCATGAACCTGGTGGCGCTGCCGTTCCGCTGGGAGCGGCTGCAGCCACGCTCAACCAG  | 420       |      |
| Sbjct 361 | GGCATGAACCTGGTGGCGCTGCCGTTCCGCTGGGAGCGGCTGCAGCCACGCTCAACCAG  | 420       |      |
| Query 421 | GGGCTCGACGCAACGAGCTGTGCGGCTGACCGGGTTCGTCAACGCCGTGACGGCGGCC   | 480       |      |
| Sbjct 421 | GGGCTCGACGCAACGAGCTGTGCGGCTGACCGGGTTCGTCAACGCCGTGACGGCGGCC   | 480       |      |
| Query 481 | GGCCAGACGGTGTGCTCGATCCGCACAACCTACGCGGCTACTACGGCAACGTGATCGGC  | 540       |      |
| Sbjct 481 | GGCCAGACGGTGTGCTCGATCCGCACAACCTACGCGGCTACTACGGCAACGTGATCGGC  | 540       |      |
| Query 541 | TCGAGCGCGGTGCCCCAACAGCGCGTACGCCGATTCTGGCGGCGGTGGCCACCCAGTTC  | 600       |      |
| Sbjct 541 | TCGAGCGCGGTGCCCCAACAGCGCGTACGCCGATTCTGGCGGCGGTGGCCACCCAGTTC  | 600       |      |
| Query 601 | AAGGGCAATGCCCGGCTCATCTTCGGGCTGATGAACGAGCCCAATTCGATGCCGACCGAG | 660       |      |
| Sbjct 601 | AAGGGCAATGCCCGGCTCATCTTCGGGCTGATGAACGAGCCCAATTCGATGCCGACCGAG | 660       |      |
| Query 661 | CAGTGG 666                                                   |           |      |
| Sbjct 661 | CAGTGG 666                                                   |           |      |

Figure S2 Comparison of *egl* gene between and *R. solanacearum* strains RsM(upper sequence) and

RsH(lower sequence).

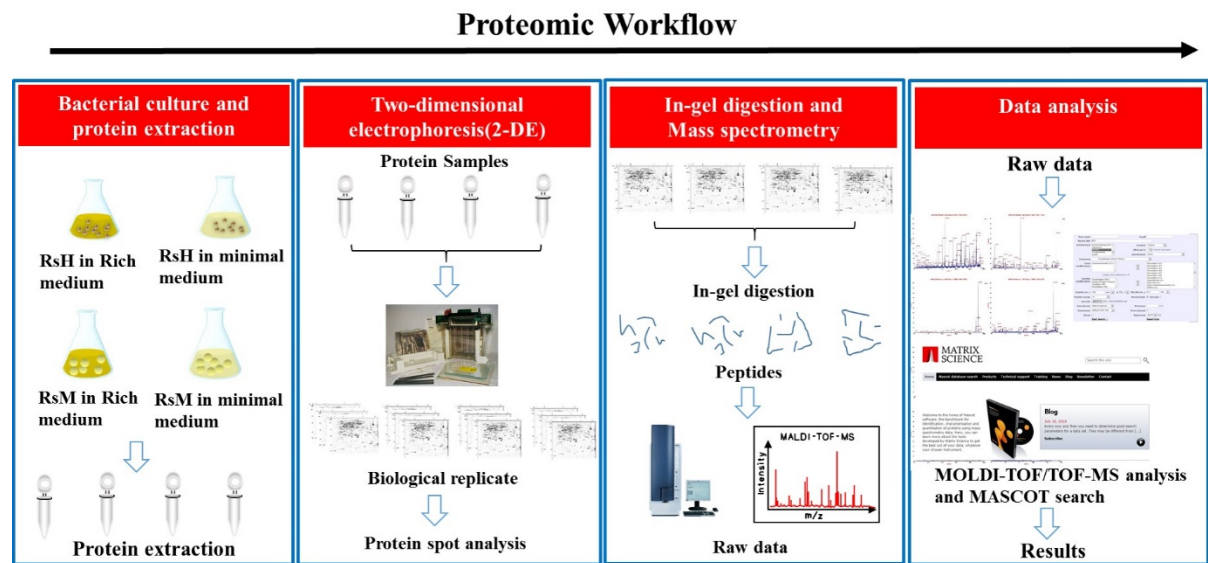

Figure S3 Experimental system of proteomic workflow.

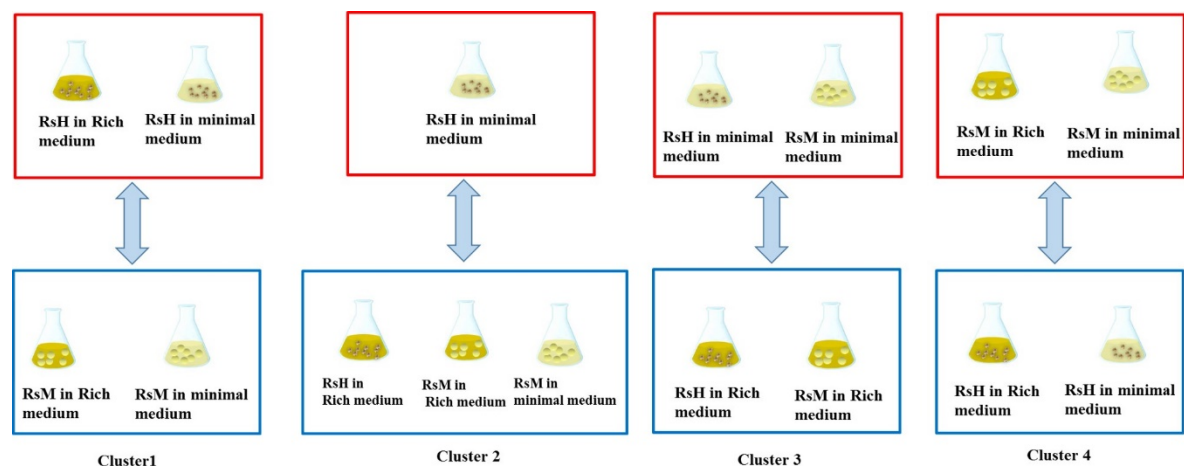

Figure S4 a brief layout of the comparison based on the protein abundance in different samples. Red box represent the protein abundance increased compared with those in blue box samples.
