# Supplementary material for: Comparative Proteomic Analysis of Two Ralstonia solanacearum Isolates Differing in Aggressiveness
Source: MDPI journal article supplement (doi:10.3390/ijms19082444), 2018-08-18
Supplement: s1 [file s1]

**Table S1 Primer used for phylotype specific multiplex PCR**

| primer      | Sequence(5'→3')          | Specificity        | length |
|-------------|--------------------------|--------------------|--------|
| Nmult21:1F  | CGTTGATGAGGCGCGCAATTT    | Phylotype I        | 144bp  |
| Nmult21:2F  | AAGTTATGGACGGTGGAAGTC    | Phylotype II       | 372bp  |
| Nmult23:AF  | ATTACSAGAGCAATCGAAAGATT  | Phylotype III      | 91bp   |
| Nmult22:InF | ATTGCCAAGACGAGAGAAGTA    | Phylotype IV       | 213bp  |
| Nmult22:RR  | TCGCTTGACCCTATAACGAGTA   | All Phylotypes     |        |
| 759         | GTCGCCGTCAACTCACTTTCC    | Specific Phylotype | 280bp  |
| 760         | GTCGCCGTCAGCAATGCGGAATCG |                    |        |

**Table S2 Primer sequences of *egl* and *hrpB* genes**

| gene        | primer                                 | length  | Locus name |
|-------------|----------------------------------------|---------|------------|
| <i>egl</i>  | Endo-F: 5' - ATGCATGCCGCTGGTCGCCGC -3' | 840 bp  | RSp0162    |
|             | Endo-R: 5' - GCGTTGCCCGGCACGAACACC -3' |         |            |
| <i>hrpB</i> | RShrpBF: 5' TGCCATGCTGGGAAACATCT -3'   | 1400 bp | RSp0873    |
|             | RShrpBR: 5' - GGGGGCTTCGTTGAACTGC -3'  |         |            |
